# Supplementary material
Source: PubMed Central journal article supplement (PMC5726892)
Supplement: NIHMS893403-supplement-Supplemental_Digital_Content_2.pdf [file NIHMS893403-supplement-Supplemental_Digital_Content_2.pdf]

Table. Y Chromosome DNA positivity in women who last reported vaginal sex >7 days ago.

| Reported sexual behavior                                                                 | Y chromosome |                       | Trend<br>( <i>p</i> -value) |
|------------------------------------------------------------------------------------------|--------------|-----------------------|-----------------------------|
|                                                                                          | Total<br>N   | DNA positive<br>n (%) |                             |
| Condom use                                                                               |              |                       | 0.76                        |
| Never (0%)                                                                               | 8            | 2 (25%)               |                             |
| Rarely/Sometimes/Most times (1-99%) <sup>a</sup>                                         | 22           | 2 (9%)                |                             |
| Always (100%)                                                                            | 13           | 2 (15%)               |                             |
| Average frequency of vaginal sex acts with<br>HITCH partner (/week)                      |              |                       | 0.28                        |
| <=2                                                                                      | 30           | 3 (10%)               |                             |
| >2-4                                                                                     | 10           | 2 (20%)               |                             |
| >4                                                                                       | 3            | 1 (33%)               |                             |
| Proportion of sex encounters where woman<br>received oral sex from male HITCH partner    |              |                       | 0.02                        |
| Never (0%)                                                                               | 6            | 0 (0%)                |                             |
| Rarely (1-25%)                                                                           | 13           | 0 (0%)                |                             |
| Sometimes (26-75%)                                                                       | 17           | 3 (18%)               |                             |
| Most times (76-99%)                                                                      | 7            | 2 (29%)               |                             |
| Always (100%)                                                                            | 2            | 1 (50%)               |                             |
| Proportion of sex encounters where woman<br>received digital sex from male HITCH partner |              |                       | 0.03                        |
| Never (0%)                                                                               | 0            | 0                     |                             |
| Rarely (1-25%)                                                                           | 5            | 0 (0%)                |                             |
| Sometimes (26-75%)                                                                       | 16           | 1 (6%)                |                             |
| Most times (76-99%)                                                                      | 17           | 2 (12%)               |                             |
| Always (100%)                                                                            | 7            | 3 (43%)               |                             |

<sup>a</sup> Combines women who reported using condoms rarely, sometimes, and most times.
